# Supplementary material for: Understanding Gel-Powers: Exploring Rheological Marvels of Acrylamide/Sodium Alginate Double-Network Hydrogels
Source: MDPI journal article supplement (doi:10.3390/molecules28124868), 2023-06-20
Supplement: s1 [file s1]

# Understanding Gel-Powers: Exploring Rheological Marvels of Acrylamide/Sodium Alginate Double-Network Hydrogels

Shi-Chang Wang<sup>1</sup>, Shu-Tong Du<sup>2</sup>, Saud Hashmi<sup>3</sup>, Shu-Ming Cui<sup>1,4</sup>, Ling Li<sup>1</sup>,  
Stephan Handschuh-Wang<sup>2,4</sup>, Xuechang Zhou<sup>2</sup> and Florian J. Stadler<sup>1,\*</sup>

- <sup>1</sup> College of Materials Science and Engineering, Shenzhen Key Laboratory of Polymer Science and Technology, Guangdong Research Center for Interfacial Engineering of Functional Materials, Shenzhen University, Shenzhen 518055, China  
<sup>2</sup> College of Chemistry and Environmental Engineering, Shenzhen University, Shenzhen 518055, China  
<sup>3</sup> Department of Polymer & Petrochemical Engineering, NED University of Engineering & Technology, Karachi 75270, Pakistan  
<sup>4</sup> The International School of Advanced Materials, School of Emergent Soft Matter, South China University of Technology, Guangzhou 511442, China  
 \* Correspondence: fjstadler@szu.edu.cn

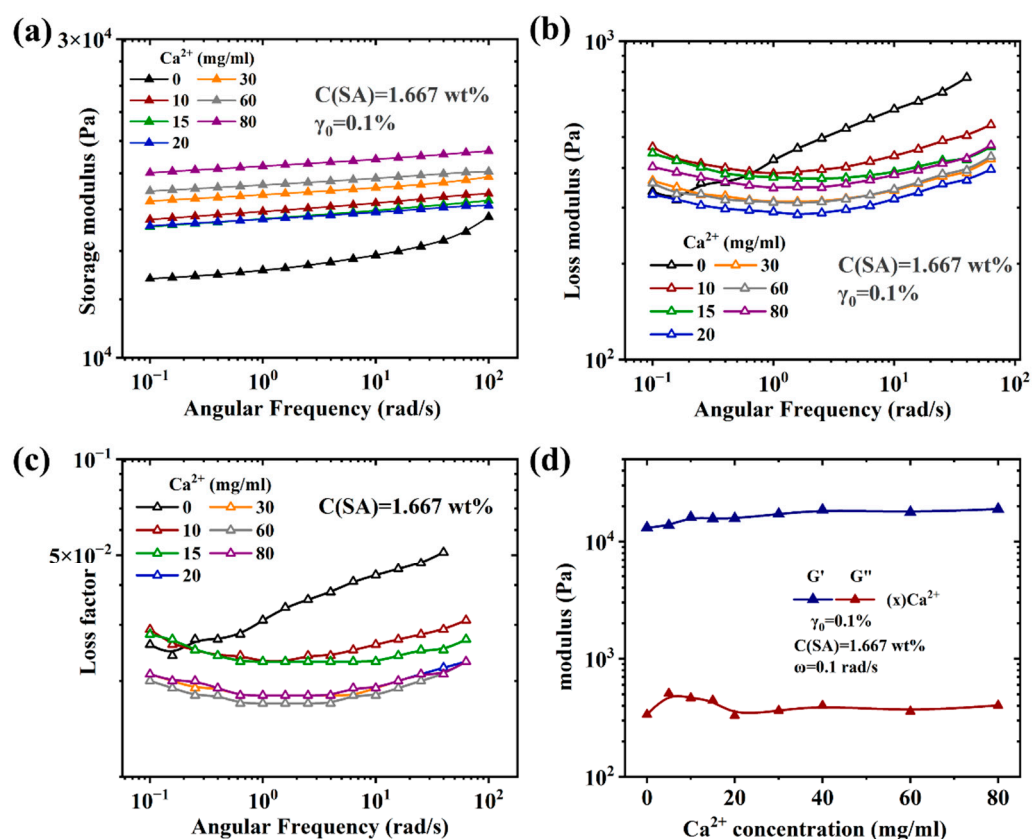

Figure S1 (a and b) Frequency scan curves for sample S2 (SA=2.667 wt%), (c) relationship between loss coefficient and angular frequency in the frequency scan, (d) modulus of sample S2 versus calcium ion concentration

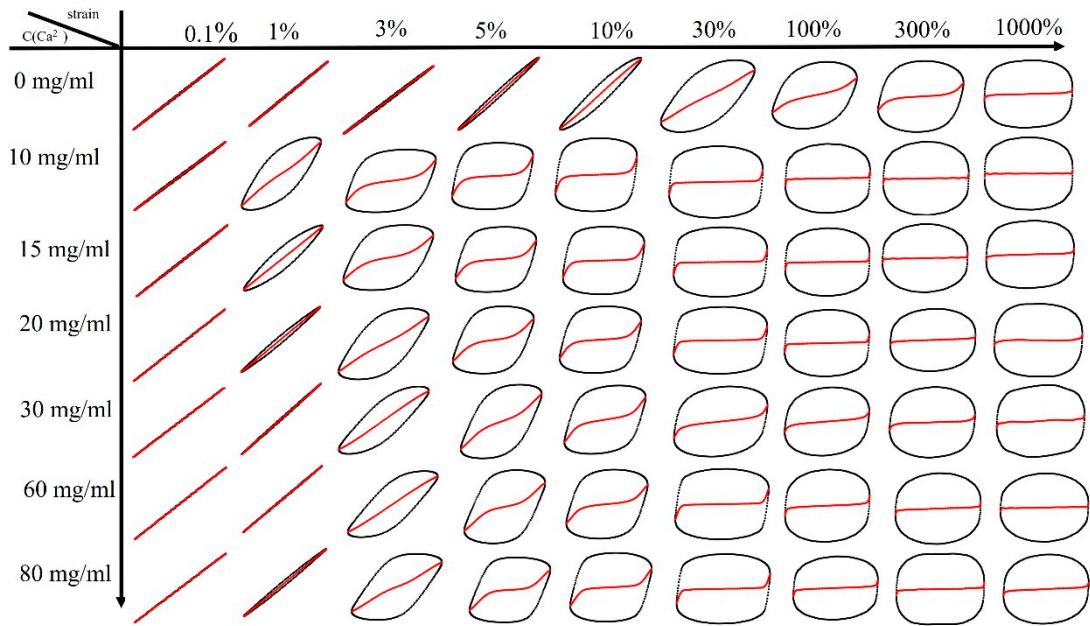

Figure S2 Elastic Lissajous curves of sample S1 at different calcium ion concentrations with different  $\gamma_0$

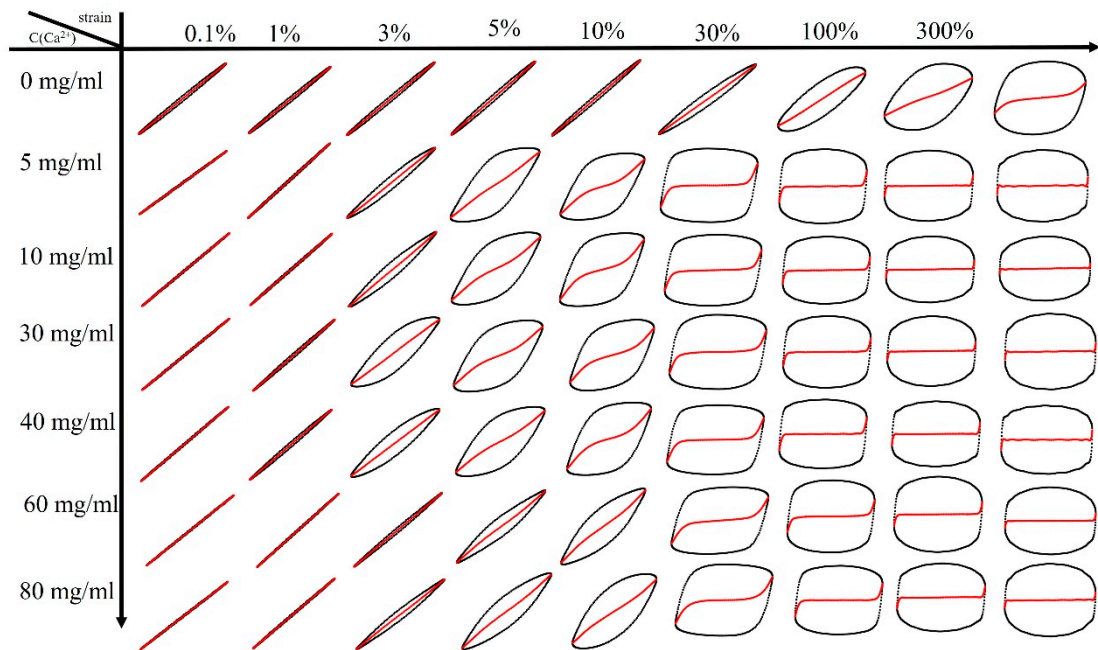

Figure S3 Elastic Lissajous curves of sample S2 at different calcium ion concentrations and different  $\gamma_0$

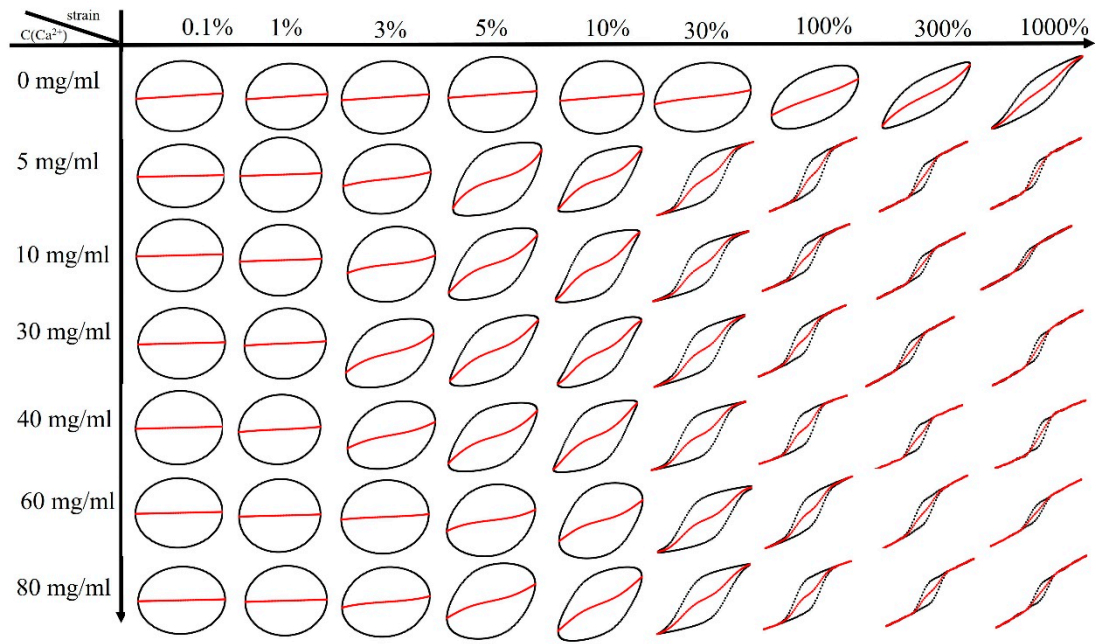

Figure S4 Viscosity Lissajous curves of sample S2 at different calcium ion concentrations with different  $\gamma_0$

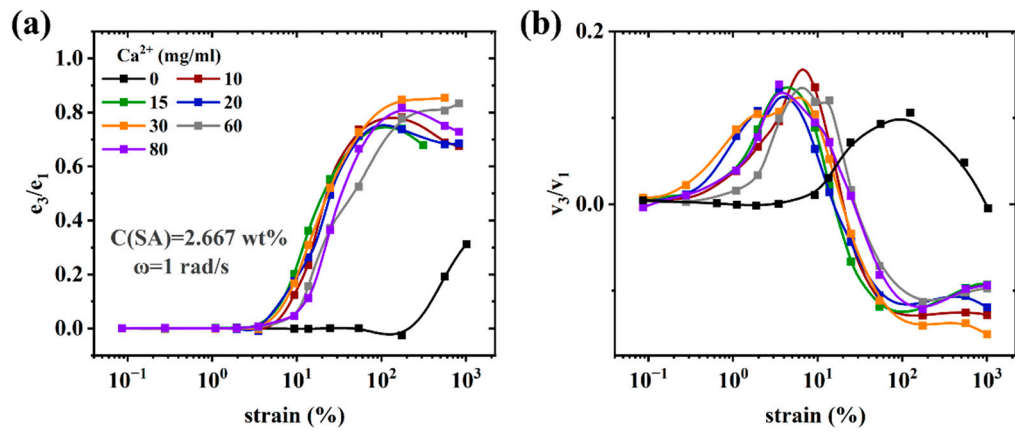

Figure S5 sample S2: (a and b) Chebyshev coefficient ( $e_3/e_1$ , and  $v_3/v_1$ ) versus strain
